# Supplementary material for: Anion binding by multidentate Lewis acids: a DFT study
Source: Royal Society of Chemistry journal article supplement (doi:10.1039/b007544m), 2001-01-01
Supplement: b007544m.doc [file b007544m.doc]

Dr. Simon Aldridge

Department of Chemistry

Cardiff University

PO Box 912

Cardiff CF10 3TB

029 875495 [office]
029 875897 [lab]
029 874030 [fax]

email: AldridgeS@cf.ac.uk

# Anion Binding by Multidentate Lewis Acids: A DFT Study

## Simon Aldridge, Ian. A. Fallis and Siân T. Howard

###### Department of Chemistry, Cardiff University, PO Box 912, Cardiff CF10 3TB

#### Supplementary data

**Geometry optimization details for complexes of 2 and 3**

*C*3 point group symmetry constraints were applied in all cases except the complexes **2·**H–, **3·**H–, **2·**CH3– and **3·**CH3–, which preferred no symmetry. Harmonic frequency calculations were feasible for all species at the 3-21G level, and these indicated that all macrocycles and complexes were kinetically stable (no imaginary frequencies) in addition to providing estimates of their vibrational energies at 298 K. Single-point calculations were then carried out using the B3-LYP density functional1,2 with 6-311+G* basis, in order to approximate the effects of electron correlation on the binding energies and charge distributions. Counterpoise corrections have not been included in the binding energies, but our recent B3-LYP/6-31+G* level study of cation binding by cyclo-[2,6]-sexipyridine lowered the binding energies by 5, 8 and 20 kJ mol–1 in Li+, Na+ and K+ complexes, respectively.3 The larger 6-311+G* basis used here should result in still smaller counterpoise corrections. The energies of the free (ground-state) atoms were also computed at this level, for the purposes of calculating heats of atomization and formation. Atomic charges were taken from a natural population analysis at the B3-LYP/6-311+G* level.4 All quantum chemical calculations employed GAUSSIAN985 running on a DEC Alpha RISC Power Challenge workstation. The (U)B3-LYP/6-311+G(d) atomization energies (vibrationally corrected at 298 K using the HF/3-21G frequencies scaled by 0.8936) of **2** and **3** are 9349 and 9996 kJ mol–1, respectively. Using the standard heats of formation in reference 7 this gives *H*o298 values of –500 and –2810 kJ mol–1, respectively, for **2** and **3**. In order to evaluate the accuracy of computed binding energies calibration calculations were carried out for the model compounds [BH3**·**X]– (X = H, F, Cl, Br, CH3) both at the B3LYP//HF level of theory and at the higher level CCSD(T)//MP2. The results of these calibration calculations are included in the supplementary data below, and reveal that although the lower level of theory in general underestimates binding energies, the discrepancies are of the order 10–20 kJ mol–1 (or *ca.* 5% of the absolute values for H–, F– and CH3– complexes). A linear regression of the B3LYP *vs*. CCSD(T) values has *R*2 = 0.98 and relates the binding energies at two levels of theory by CCSD(T) = 1.055B3LYP kJ mol–1, with a standard deviation of 5 kJ mol–1.

## **References**

1 C. Lee, W. Yang and R. G. Parr, *Phys. Rev.* B, 1988, **41**, 785.

2 A. D. Becke, *J. Chem. Phys.*, 1993, **98**,5648.

3 S. T. Howard and I. A. Fallis, *J. Chem. Soc., Perkin Trans. 2*, 1999, 2501.

4 J. P. Foster and F. Weinhold, *J. Am. Chem. Soc.*, 1980, **102**, 7211.

5 M. J. Frisch, G. W. Trucks, H. B. Schlegel, P. M. Gill, B. G. Johnson, M. A. Robb, J. R. Cheeseman, T. Keith, G. A. Petersson, J. A. Montgomery, K. Raghavachari, A. Al-Laham, V. G. Zakrzewski, J. V. Ortiz, J. B. Foresman, J. Cioslowski, B. B. Stefanov, A. Nanayakkara, M. Challacombe, C. Y. Peng, P. Y. Ayala, W. Chen, M. W. Wong, J. L. Andres, E. S. Replogle, R. Gomperts, R. L. Martin, D. J. Fox, J. S. Binkley, D. J. Defrees, J. Baker, J. P. Stewart, M. Head-Gordon, C. Gonzalez and J. A. Pople, *Gaussian 98,* Gaussian, Inc., Pittsburgh PA, 1999.

6 R. F. Hout, B. A. Levi and W. J. Hehre, *J. Comput. Chem.,* 1982, **3**, 234.

7 *CRC Handbook Of Chemistry And Physics*, ed. R. Lide and H. P. R. Frederikse CRC Press, London, 1997.

**Results of calibration calculations on model complexes of the type [BH3.X]- (X = H, F, Cl, Br, CH3)**

| X | HF/6-31+G* | | MP2/6-311+G** | | B3LYP  //HF*a* | CCSD(T)//MP2*b* | |
| --- | --- | --- | --- | --- | --- | --- | --- |
|  | R(B…X)*c* | Evib(au) | R(B…X)*c* | -E(au) | BE*d,e*  (kJmol-1) | -E(au) | BE*d,e*  (kJmol-1) |
| H | 1.245 | 0.037744 | 1.237 | 27.27040 | 358.9 | 27.15769 | 375.7 |
| F | 1.460 | 0.034113 | 1.482 | 126.60723 | 257.2 | 126.30511 | 268.7 |
| Cl | 2.036 | 0.034043 | 1.951 | 486.97084 | 122.3 | 486.29846 | 149.9 |
| Br | 2.220 | 0.034003 | 2.142 | 2600.89554 | 97.8 | 2599.14852 | 116.6 |
| CH3 | 1.662 | 0.070147 | 1.655 | 66.59988 | 334.3 | 66.37880 | 346.8 |
|  |  |  |  |  |  |  |  |

*a* B3LYP/6-311+G* // HF/6-31+G* single point energies.

b CCSD(T)/6-311+G** // MP2/6-311+G** single point energies.

c Distances in Å.

d Anion Binding Energies in kJ/mol (Including HF/6-31+G* thermal corrections).

*e* Binding energy for any anion at the CCSD(T) level of theory (*y*) is related to that at the

B3LYP level (*x*) by the empirical relation, *y* = 0.965*x* + 25.8 kJmol-1, (*R*2 = 0.97).

HF/6-31+G* thermal energy of BH3 = 0.030490 a.u.

HF/6-31+G* thermal energy of Me- = 0.033194 a.u.

B3LYP/6-311+G* Energy of H- = -0.50986

B3LYP/6-311+G* Energy of F- = -99.88869

B3LYP/6-311+G* Energy of Cl- = -460.30373

B3LYP/6-311+G* Energy of Br- = -2574.23779

B3LYP/6-311+G*//HF/6-31+G* Energy of Me- = -39.84942

B3LYP/6-311+G*//HF/6-31+G* Energy of BH3 = -26.61736

CCSD(T) energy of H- = -0.48851

CCSD(T) energy of F- = -99.67993

CCSD(T) energy of Cl- = -459.71859

CCSD(T) energy of Br- = -2572.58136

CCSD(T)//MP2 energy of Me- = -39.72133

CCSD(T)//MP2 energy of BH3 = -26.51962
